# Supplementary material for: Spin filtering effect, thermal spin diode effect and high tunneling magnetoresistance in the Au/GdI2/Au van der Waals junction
Source: Royal Society of Chemistry journal article supplement (doi:10.1039/d2nr01757a), 2022-01-01
Supplement: d2nr01757a1.pdf [file d2nr01757a1.pdf]

## Supporting information for

### “Spin filtering effect, thermal spin diode effect and high tunneling magnetoresistance in the Au/GdI<sub>2</sub>/Au van der Waals junction”

Lei Hu,<sup>a</sup> Xuming Wu,<sup>b</sup> Yulin Feng,<sup>c</sup> Yuqi Liu,<sup>a</sup> Zhiyuan Xu,<sup>a</sup> and Guoying Gao<sup>\*a</sup>

<sup>a</sup>School of Physics and Wuhan National High Magnetic Field Center, Huazhong University of Science and Technology, Wuhan 430074, China

<sup>b</sup>College of Physical Science and Technology, Lingnan Normal University, Zhanjiang 524048, China

<sup>c</sup>College of Physics and Electronic Science, Hubei Normal University, Huangshi 435002, China

\*E-mail: guoying\_gao@mail.hust.edu.cn

#### 1. Electronic structure of bulk and 4-layer GdI<sub>2</sub>

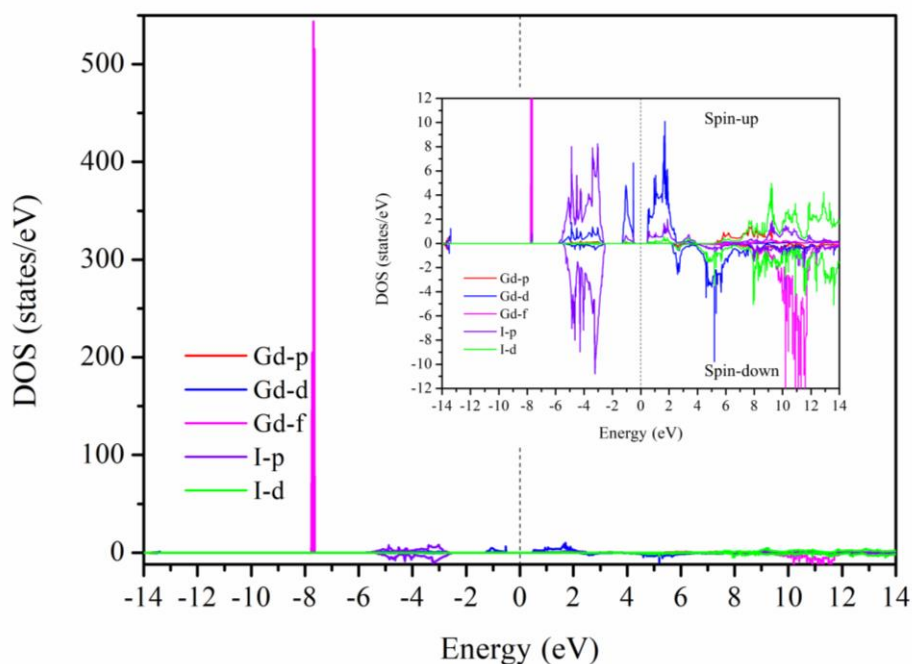

**Fig. S1** The spin-dependent density of states (DOS) for ferromagnetic bulk GdI<sub>2</sub> within GGA-PBE.

The inset shows a zoomed-in view near the Fermi level. The Fermi level is at zero eV.

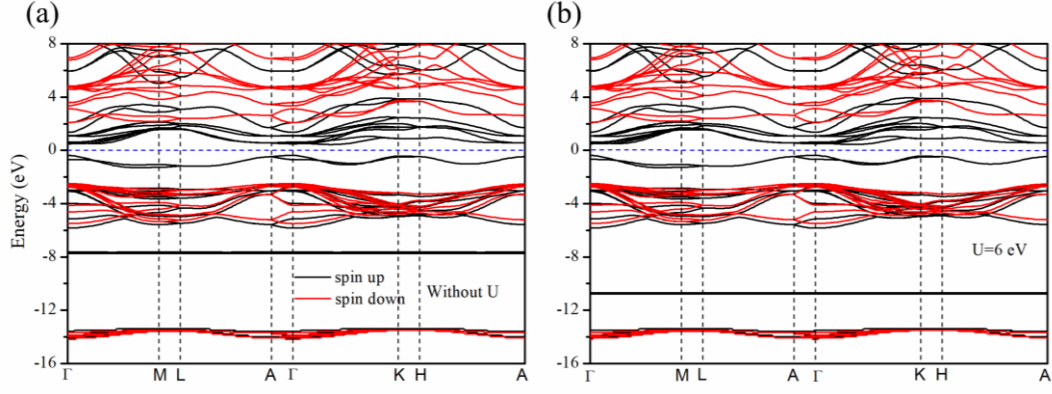

**Fig. S2** The spin-dependent band structure of bulk  $\text{GdI}_2$  without  $U$  and with  $U=6$  eV.

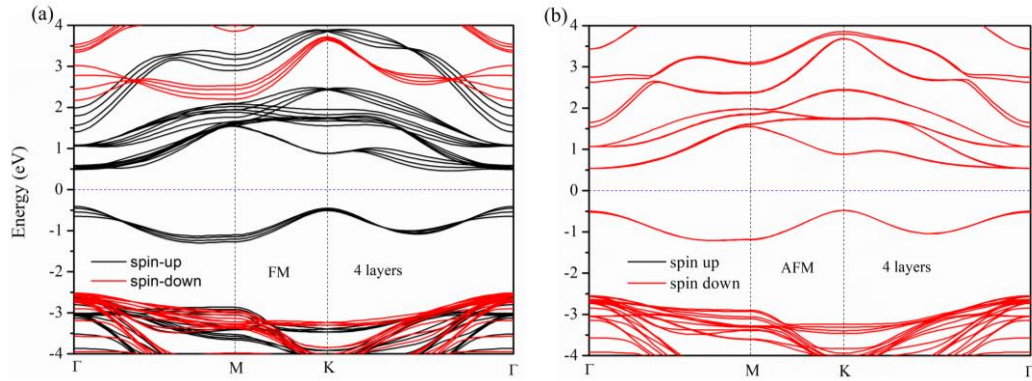

**Fig. S3** Spin-dependent band structures within GGA-PBE for four-layer  $\text{GdI}_2$  in FM (a) and AFM (b) states.

## 2. The effect of SOC on band structure and transport properties

We calculate the ferromagnetic and antiferromagnetic band structures of bulk  $\text{GdI}_2$  within GGA+SOC (Fig. S4). Compared to those within GGA (Figs. 1(c,d)), it is found that the SOC effect is very slight likewise that of monolayer  $\text{GdI}_2$  which energy gap is decreased by only 0.01 eV by SOC (Fig. S8 in Ref. 21), and there is almost no change of the shape of energy band.

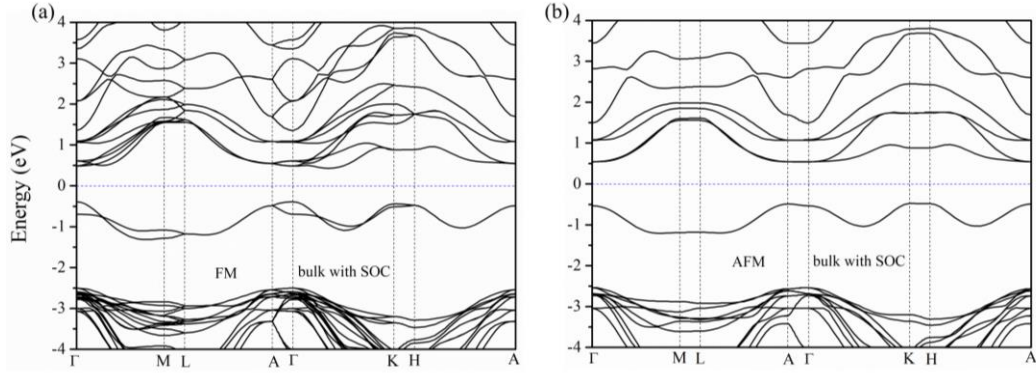

**Fig. S4** The spin-dependent band structure of bulk  $\text{GdI}_2$  with SOC in FM (a) and AFM (b).

Then, as an example, we calculate the spin-dependent conductance and TMR at zero bias voltage within SOC. As shown the following Table S1, the SOC decreases a little the conductance and the TMR value, but the TMR value is still high, 570% at zero bias voltage. Similar phenomenon at the finite bias voltage can be deduced.

**Table S1** Spin-dependent conductance and TMR value at zero bias voltage for the  $\text{Au}/\text{GdI}_2/\text{Au}$  junction in FM and AFM states with and without SOC. The values in brackets are the results without SOC.  $\uparrow$  and  $\downarrow$  represent the spin-up and spin-down channels, respectively.

| Magnetic state | Conductance (Siemens)                                                                                                         | TMR    |
|----------------|-------------------------------------------------------------------------------------------------------------------------------|--------|
| FM             | $1.64 \times 10^{-9}$ ( $1.73 \times 10^{-9}$ ) $\uparrow$ ; $5.71 \times 10^{-12}$ ( $6.74 \times 10^{-12}$ ) $\downarrow$   | 570%   |
| AFM            | $2.21 \times 10^{-10}$ ( $2.20 \times 10^{-10}$ ) $\uparrow$ ; $2.20 \times 10^{-11}$ ( $1.49 \times 10^{-11}$ ) $\downarrow$ | (641%) |

### 3. Project DOS of the $\text{Au}/\text{GdI}_2/\text{Au}$ junction with AFM state

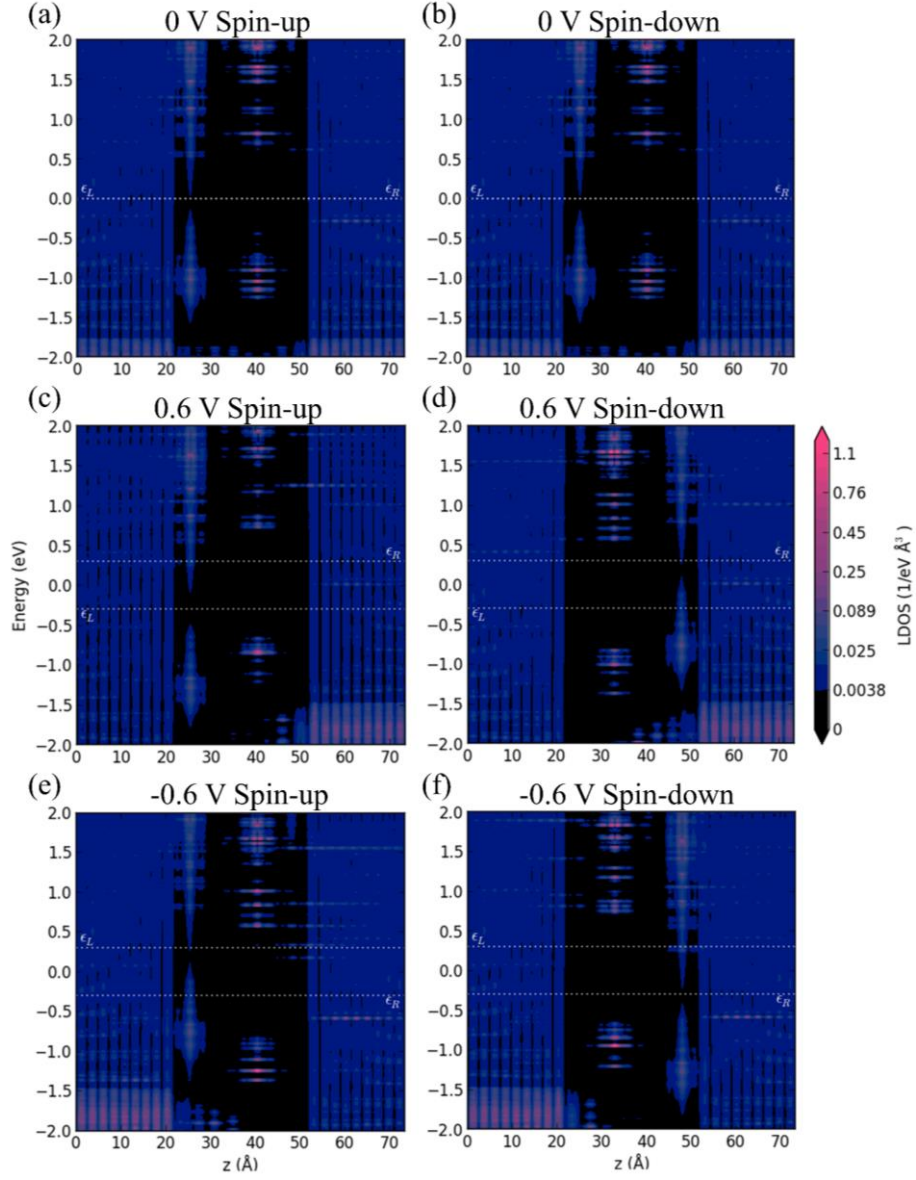

**Fig. S5** The spin-dependent projected local density of states in the Au/GdI<sub>2</sub>/Au junction with antiferromagnetic state at the bias voltages of zero, -0.6 and 0.6 V.
